# Supplementary material for: Doa10 is a membrane protein retrotranslocase in ER-associated protein degradation
Source: eLife. 2020 Jun 26;9:e56945. doi: 10.7554/eLife.56945 (PMC7319771; doi:10.7554/eLife.56945)
Supplement: Figure 1—figure supplement 1—source data 1. [file elife-56945-fig1-figsupp1-data1.xlsx]

## Sheet: Sheet1
Quantification of 35 min timepoints
DL680 fluorescence (corresponding to not cleaved Ubc6)					Protected fraction of Ubc6
	rep1	rep2	rep3			rep1	rep2	rep3	mean	sd
-	174000	45600	47100		-	1	1	1
TEV	80200	20100	23600		TEV	0.46092	0.440789	0.501062	0.46759	0.03068
Ulp1	76100	20900	22100		Ulp1	0.437356	0.458333	0.469214	0.45497	0.01619
TEV + Ulp1	5050	1170	1310		TEV + Ulp1	0.029023	0.0256579	0.0278132	0.0275	0.0017
DL680 fluorescence (Ulp1-cleaved Ubc6)					Fraction of Ulp1-cleaved Ubc6 protected from TEV-protease
	rep1	rep2	rep3			rep1	rep2	rep3	mean	sd
Ulp1	114000	27700	28800		Ulp1	1	1	1
TEV + Ulp1	86600	19800	20700		TEV + Ulp1	0.759649	0.714801	0.71875	0.73107	0.02483
