# Supplementary material for: Doa10 is a membrane protein retrotranslocase in ER-associated protein degradation
Source: eLife. 2020 Jun 26;9:e56945. doi: 10.7554/eLife.56945 (PMC7319771; doi:10.7554/eLife.56945)
Supplement: Figure 1—source data 1. [file elife-56945-fig1-data1.xlsx]

## Sheet: rep1
		DyLight680 (Ubc6)			Rhodamine (lipids)
sample	chaperone	Input	Supernatant	Supernatant / Input	Input	Supernatant	Supernatant / Input
Fused, + Doa10	/	100984	5821.61	0.0576491	41804	1506	0.0360253
	Get3	97892.2	37836.4	0.386511	44683	2022	0.0452521
	Get3 D57N	97226.9	37625.6	0.386987	43957	1899	0.0432013
	Get3 I193D	93305.7	13237.8	0.141875	41833	1444	0.0345182
Fused, - Doa10	/	97849.7	2541.56	0.0259741	44596	1205	0.0270204
	Get3	99921.7	7585.03	0.0759097	46529	1417	0.0304541
	Get3 D57N	102717	6963.63	0.0677946	44637	1361	0.0304904
	Get3 I193D	97841.4	3970.58	0.0405818	42456	1197	0.0281939
Inhibited, + Doa10	/	103804	4074.47	0.0392515	41283	1818	0.0440375
	Get3	102592	10837.2	0.105634	45784	2470	0.053949
	Get3 D57N	103485	8590.99	0.0830166	44394	1718	0.0386989
	Get3 I193D	100324	4005.77	0.0399285	41840	1610	0.0384799
Inhibited, - Doa10	/	98849.7	2313.88	0.0234081	41885	2895	0.0691178
	Get3	105966	5493.51	0.051842	45856	3169	0.0691076
	Get3 D57N	106499	6616.22	0.0621247	43974	3271	0.0743849
	Get3 I193D	100294	3902.87	0.0389143	41484	3262	0.0786327

## Sheet: rep2
		DyLight680 (Ubc6)			Rhodamine (lipids)
sample	chaperone	Input	Supernatant	Supernatant / Input	Input	Supernatant	Supernatant / Input
Fused, + Doa10	/	101121	10310.7	0.101964	39329	2781	0.0707112
	Get3	105393	44349.3	0.420799	41454	2391	0.0576784
	Get3 D57N	106682	45545.5	0.426926	41167	2306	0.0560157
	Get3 I193D	105968	18212.7	0.17187	38039	2289	0.0601751
Fused, - Doa10	/	107327	3326.03	0.0309898	36854	864	0.0234439
	Get3	105734	10218.8	0.096646	39968	1613	0.0403573
	Get3 D57N	107013	8742.74	0.0816981	38576	1261	0.0326887
	Get3 I193D	105941	4744.23	0.0447819	36636	881	0.0240474
Inhibited, + Doa10	/	106626	5792.34	0.0543237	38294	1994	0.0520708
	Get3	107464	9020.37	0.0839387	38834	1426	0.0367204
	Get3 D57N	108642	8967.21	0.0825392	38612	1471	0.038097
	Get3 I193D	107371	4058.23	0.0377961	36461	1104	0.0302789
Inhibited, - Doa10	/	102350	4127.03	0.0403227	37505	1244	0.0331689
	Get3	105602	6209.94	0.058805	37508	966	0.0257545
	Get3 D57N	106590	7788	0.0730651	37662	1321	0.0350751
	Get3 I193D	105903	4666.34	0.0440622	35403	1046	0.0295455

## Sheet: rep3
		DyLight680 (Ubc6)			Rhodamine (lipids)
sample	chaperone	Input	Supernatant	Supernatant / Input	Input	Supernatant	Supernatant / Input
Fused, + Doa10	/	91186.3	8817.04	0.0966926	35633	1714	0.0481015
	Get3	93126.7	44287.5	0.475562	39490	1941	0.0491517
	Get3 D57N	92428.8	43487.3	0.470495	38474	1919	0.0498778
	Get3 I193D	92998.7	17955.7	0.193075	35874	1786	0.0497854
Fused, - Doa10	/	98241.5	3784.98	0.0385274	36884	946	0.025648
	Get3	100333	8779.21	0.0875011	37152	1291	0.0347491
	Get3 D57N	99119.5	7895.77	0.0796591	36747	1297	0.0352954
	Get3 I193D	100851	5825.06	0.0577591	35968	1147	0.0318895
Inhibited, + Doa10	/	100562	4061.3	0.0403859	36405	1375	0.0377695
	Get3	96715.3	8942.79	0.0924651	37681	1355	0.0359598
	Get3 D57N	98123.9	9000.15	0.0917223	37427	1545	0.0412804
	Get3 I193D	99057.2	4940.64	0.0498766	36379	1356	0.0372743
Inhibited, - Doa10	/	93554.3	2833.79	0.0302904	37582	1023	0.0272205
	Get3	101990	8841.99	0.0866945	40955	1366	0.0333537
	Get3 D57N	97976.4	7272.27	0.0742247	37712	1192	0.031608
	Get3 I193D	101131	4559	0.0450801	36791	1045	0.0284037

## Sheet: statistics
		DyLight680 (Ubc6)		Rhodamine (lipids)
sample	chaperone	mean	SD	mean	SD
Fused, + Doa10	/	0.08544	0.02421	0.05161	0.01761
	Get3	0.42762	0.04492	0.05069	0.00636
	Get3 D57N	0.42814	0.04177	0.0497	0.00641
	Get3 I193D	0.16894	0.02573	0.04816	0.01291
Fused, - Doa10	/	0.03183	0.00632	0.02537	0.0018
	Get3	0.08669	0.01039	0.03519	0.00497
	Get3 D57N	0.07638	0.00751	0.03282	0.00241
	Get3 I193D	0.04771	0.00895	0.02804	0.00392
Inhibited, + Doa10	/	0.04465	0.00839	0.04463	0.00717
	Get3	0.09401	0.01093	0.04221	0.01017
	Get3 D57N	0.08576	0.00517	0.03936	0.00169
	Get3 I193D	0.04253	0.00645	0.03534	0.00443
Inhibited, - Doa10	/	0.03134	0.00851	0.04317	0.02267
	Get3	0.06578	0.01844	0.04274	0.02315
	Get3 D57N	0.0698	0.00668	0.04702	0.02376
	Get3 I193D	0.04269	0.00331	0.04553	0.02868
