# Supplementary material for: Doa10 is a membrane protein retrotranslocase in ER-associated protein degradation
Source: eLife. 2020 Jun 26;9:e56945. doi: 10.7554/eLife.56945 (PMC7319771; doi:10.7554/eLife.56945)
Supplement: Figure 1—source data 2. [file elife-56945-fig1-data2.xlsx]

## Sheet: Fig1E_F
Normalized A488 fluorescence signal at t=30 min (after anti-A488 antibody addition)						F (– Doa10) - F (+ Doa10) at 30 min
	Fused, + Doa10	Fused, - Doa10	Docked, + Doa10	Docked, - Doa10			Fused	Docked
rep1	0.1333	0.426	0.3766	0.40983		rep1	0.2927	0.03323
rep2	0.05021	0.39787	0.26989	0.39419		rep2	0.34766	0.1243
rep3	0.08781	0.42011	0.30218	0.40777		rep3	0.3323	0.10559
rep4	0.09358	0.4188	0.32648	0.38738		rep4	0.32522	0.0609
						mean	0.32447	0.08101
						standard deviation	0.02316	0.0415
