# Supplementary material for: Doa10 is a membrane protein retrotranslocase in ER-associated protein degradation
Source: eLife. 2020 Jun 26;9:e56945. doi: 10.7554/eLife.56945 (PMC7319771; doi:10.7554/eLife.56945)
Supplement: Figure 1—source data 3. [file elife-56945-fig1-data3.xlsx]

## Sheet: rep1
Ubc6DL680 fluorescence signal							Fraction not cleaved by TEV protease
		Ubc6		SUMO-Ubc6					Ubc6		SUMO-Ubc6
TEV protease	Time (min)	+ Doa10	- Doa10	+ Doa10	- Doa10		TEV protease	Time (min)	+ Doa10	- Doa10	+ Doa10	- Doa10
-	5	32592.4	26382.9	11611	18866.4
-	60	36033.6	27245.5	10837	18617.9
+	5	16541.2	22567.4	2458.42	3015.86		+	5	0.507517	0.85538	0.211732	0.159853
+	10	13638.3	21614	1961.38	2263.16		+	10	0.418451	0.819242	0.168924	0.119957
+	20	10647.2	20667.1	1460.94	1782.8		+	20	0.326677	0.783353	0.125824	0.0944957
+	30	9346.41	20374	1237.41	1623.71		+	30	0.286766	0.772244	0.106572	0.0860635
+	60	6824.76	18281.5	890.985	1235.23		+	60	0.209397	0.692929	0.0767361	0.0654726
+, detergent	60	1117.89	966.725	36.9588	56.291		+, detergent	60	0.0342992	0.0366421	0.00318308	0.00298366

## Sheet: rep2
Ubc6DL680 fluorescence signal							Fraction not cleaved by TEV protease
		Ubc6		SUMO-Ubc6					Ubc6		SUMO-Ubc6
TEV protease	Time (min)	+ Doa10	- Doa10	+ Doa10	- Doa10		TEV protease	Time (min)	+ Doa10	- Doa10	+ Doa10	- Doa10
-	5	32041.6	26780	12135.4	20399
-	60	32513	26644	10662.7	19180.3
+	5	17904.4	22732.6	1645.96	2340.55		+	5	0.558786	0.848867	0.135633	0.114738
+	10	16321.3	22100.7	1316.28	1677.63		+	10	0.509378	0.825269	0.108466	0.0822406
+	20	13683	21357.4	1020.42	1413.87		+	20	0.427038	0.797513	0.0840864	0.0693107
+	30	12343.4	20976	881.9	1280.29		+	30	0.385229	0.78327	0.0726715	0.0627621
+	60	9856.58	19111.3	642.533	1008.84		+	60	0.307618	0.713643	0.0529468	0.0494555
+, detergent	60	964.231	1040.09	38.5648	40.7646		+, detergent	60	0.0300931	0.0388383	0.00317787	0.00199836

## Sheet: rep3
Ubc6DL680 fluorescence signal							Fraction not cleaved by TEV protease
		Ubc6		SUMO-Ubc6					Ubc6		SUMO-Ubc6
TEV protease	Time (min)	+ Doa10	- Doa10	+ Doa10	- Doa10		TEV protease	Time (min)	+ Doa10	- Doa10	+ Doa10	- Doa10
-	5	31749.4	28221.9	12481.2	22042.3
-	60	32883.1	28332.7	11707.5	21160.9
+	5	19268.2	24288.5	2325.18	3164.16		+	5	0.606883	0.860627	0.186295	0.143549
+	10	16115.6	24047.6	1605.04	2084.62		+	10	0.507588	0.852092	0.128597	0.0945737
+	20	13466.3	22942	1225.82	1652.73		+	20	0.424143	0.812916	0.0982137	0.0749801
+	30	12549.4	22571.4	1082.56	1479.39		+	30	0.395265	0.799784	0.0867355	0.0671158
+	60	10209.1	22108.6	775.857	1250.32		+	60	0.321553	0.783384	0.062162	0.0567235
+, detergent	60	1041.1	1099.88	55.9464	53.7377		+, detergent	60	0.0327911	0.0389728	0.00448246	0.00243794

## Sheet: Statistics
Fraction not cleaved by TEV protease
		Ubc6				SUMO-Ubc6
TEV protease	Time (min)	+ Doa10		- Doa10		+ Doa10		- Doa10
		mean	sd	mean	sd	mean	sd	mean	sd
+	5	0.55773	0.04969	0.85496	0.00589	0.17789	0.03874	0.13938	0.02284
+	10	0.47847	0.05199	0.8322	0.01749	0.13533	0.03079	0.09892	0.01923
+	20	0.39262	0.05713	0.79793	0.01479	0.10271	0.02123	0.0796	0.01321
+	30	0.35575	0.05996	0.7851	0.01386	0.08866	0.01703	0.07198	0.01239
+	60	0.27952	0.06113	0.72999	0.04739	0.06395	0.01199	0.05722	0.00802
