# Supplementary material for: Doa10 is a membrane protein retrotranslocase in ER-associated protein degradation
Source: eLife. 2020 Jun 26;9:e56945. doi: 10.7554/eLife.56945 (PMC7319771; doi:10.7554/eLife.56945)
Supplement: Figure 2—source data 1. [file elife-56945-fig2-data1.xlsx]

## Sheet: rep1
	non-ubiquitinated Ubc6DL680 fluorescence signal							Fraction of unmodified Ubc6
time (min)	Complete reaction	-Ubc7	-Cue1	-Doa10	Docked		time (min)	Complete reaction	-Ubc7	-Cue1	-Doa10	Docked
0	229377	215220	207353	223914	227651		0	1	1	1	1	1
1	165390	158151	142212				1	0.72104	0.734834	0.685845
2	138600	129384	114070				2	0.604248	0.60117	0.550122
5	116027	107874	90720.2				5	0.505837	0.501228	0.437515
10	100684	93803	76233.5	183742	158740		10	0.438944	0.435846	0.367651	0.82059	0.697295
30	74907.1	71593.3	56704.5	139272	126597		30	0.326568	0.332651	0.273469	0.62199	0.556101
60	61940.7	59551.7	45888.8	118946	117681		60	0.270039	0.276701	0.221308	0.531212	0.516935
60, - ATP	212979	210550	202829	216874	220568		60, - ATP	0.928513	0.9783	0.978182	0.968559	0.968888

## Sheet: rep2
	non-ubiquitinated Ubc6DL680 fluorescence signal							Fraction of unmodified Ubc6
time (min)	Complete reaction	-Ubc7	-Cue1	-Doa10	Docked		time (min)	Complete reaction	-Ubc7	-Cue1	-Doa10	Docked
0	241992	231614	221013	251456	241179		0	1	1	1	1	1
1	174479	166916	157370				1	0.72101	0.720663	0.71204
2	149225	143749	135158				2	0.616653	0.620638	0.611538
5	123825	118849	108104				5	0.51169	0.513134	0.489131
10	111006	105480	96284.9	194182	169992		10	0.458717	0.455412	0.435653	0.772231	0.704837
30	84809	80012.9	71564.7	153437	141884		30	0.350462	0.345457	0.323804	0.610194	0.588292
60	66261.9	64247.9	58065.4	131006	124030		60	0.273818	0.277392	0.262724	0.520988	0.514266
60, - ATP	218133	228457	223728	234268	239205		60, - ATP	0.901407	0.986369	1.01228	0.931646	0.991816

## Sheet: rep3
	non-ubiquitinated Ubc6DL680 fluorescence signal							Fraction of unmodified Ubc6
time (min)	Complete reaction	-Ubc7	-Cue1	-Doa10	Docked		time (min)	Complete reaction	-Ubc7	-Cue1	-Doa10	Docked
0	227588	220231	223584	234537	229312		0	1	1	1	1	1
1	195054	190797	196472				1	0.857051	0.866353	0.878738
2	180667	172431	176083				2	0.793833	0.782957	0.787548
5	161538	153800	160852				5	0.709784	0.698361	0.719427
10	144535	133988	141214	183902	176134		10	0.635076	0.608401	0.631593	0.784108	0.768098
30	115648	108961	108616	146557	141362		30	0.508149	0.494757	0.485793	0.624879	0.616463
60	87005.4	85318.6	86703.9	114433	115951		60	0.382294	0.387406	0.387791	0.487909	0.505647
60, - ATP	206104	218516	216520	218439	218015		60, - ATP	0.905603	0.992213	0.968407	0.931363	0.950737

## Sheet: Statistics
	Fraction of unmodified Ubc6
time (min)	Complete reaction		-Ubc7		-Cue1		-Doa10		Docked
	mean	sd	mean	sd	mean	sd	mean	sd	mean	sd
0	1	0	1	0	1	0	1	0	1	0
1	0.76637	0.07853	0.77395	0.08034	0.75887	0.10463
2	0.67158	0.10606	0.66825	0.09981	0.64974	0.12324
5	0.57577	0.1161	0.57091	0.11054	0.54869	0.1501
10	0.51091	0.10798	0.49989	0.09448	0.4783	0.13704	0.79231	0.0252	0.72341	0.03888
30	0.39506	0.09866	0.39095	0.09012	0.36102	0.11095	0.61902	0.00778	0.58695	0.0302
60	0.30872	0.06375	0.31383	0.06372	0.29061	0.08667	0.51337	0.02263	0.51228	0.0059
