# Supplementary material for: Doa10 is a membrane protein retrotranslocase in ER-associated protein degradation
Source: eLife. 2020 Jun 26;9:e56945. doi: 10.7554/eLife.56945 (PMC7319771; doi:10.7554/eLife.56945)
Supplement: Figure 2—source data 2. [file elife-56945-fig2-data2.xlsx]

## Sheet: rep1
	DL680 fluorescence signal of unmodified Ubc6					Fraction of unmodified Ubc6
time (min)	Ubc6 WT	Ubc6C87A	Ub-Ubc6C87A		time (min)	Ubc6 WT	Ubc6C87A	Ub-Ubc6C87A
0	223118	211134	261003		0	1	1	1
5	143521	205770	170793		5	0.64325	0.974594	0.654371
10	118897	197382	148125		10	0.532889	0.934864	0.567524
30	87499.6	177455	114109		30	0.392167	0.840483	0.437196
60	68514.9	164902	95513.8		60	0.307079	0.781027	0.365949
60, -ATP	210418	197804	245554		60, -ATP	0.943078	0.936864	0.94081

## Sheet: rep2
	DL680 fluorescence signal of unmodified Ubc6					Fraction of unmodified Ubc6
time (min)	Ubc6 WT	Ubc6C87A	Ub-Ubc6C87A		time (min)	Ubc6 WT	Ubc6C87A	Ub-Ubc6C87A
0	219066	209132	243636		0	1	1	1
5	141607	199490	177584		5	0.646413	0.953896	0.728892
10	125712	195984	157202		10	0.573856	0.93713	0.645236
30	94287.9	185252	127316		30	0.43041	0.885813	0.522568
60	74630.4	168536	106329		60	0.340676	0.805885	0.436425
60, -ATP	212282	199798	232816		60, -ATP	0.969036	0.955368	0.955589

## Sheet: rep3
	DL680 fluorescence signal of unmodified Ubc6					Fraction of unmodified Ubc6
time (min)	Ubc6 WT	Ubc6C87A	Ub-Ubc6C87A		time (min)	Ubc6 WT	Ubc6C87A	Ub-Ubc6C87A
0	99635.9	98202.2	79522.2		0	1	1	1
5	63181.2	94902.4	46499.8		5	0.634121	0.966398	0.584739
10	56261.7	95355.7	40395.8		10	0.564673	0.971013	0.507981
30	42004.6	83542.9	31336.1		30	0.42158	0.850723	0.394054
60	36342.7	79773.9	27591.6		60	0.364755	0.812343	0.346968
60, -ATP	98372.3	98281.3	82544.7		60, -ATP	0.987318	1.00081	1.03801

## Sheet: Statistics
	Fraction of unmodified Ubc6
time (min)	Ubc6 WT		Ubc6C87A		Ub-Ubc6C87A
	mean	sd	mean	sd	mean	sd
0	1	0	1	0	1	0
5	0.64126	0.00638	0.96496	0.01042	0.656	0.07209
10	0.55714	0.0215	0.94767	0.02025	0.57358	0.06883
30	0.41472	0.02002	0.85901	0.02377	0.45127	0.0654
60	0.3375	0.02897	0.79975	0.01653	0.38311	0.04713
