# Supplementary material for: Doa10 is a membrane protein retrotranslocase in ER-associated protein degradation
Source: eLife. 2020 Jun 26;9:e56945. doi: 10.7554/eLife.56945 (PMC7319771; doi:10.7554/eLife.56945)
Supplement: Figure 2—source data 3. [file elife-56945-fig2-data3.xlsx]

## Sheet: rep1
	DL680 fluorescence signal of unmodified Ubc6						Fraction of unmodified Ubc6
time (min)	+Doa10	-Doa10	Fusion inhibited	Docked		time (min)	+Doa10	-Doa10	Fusion inhibited	Docked
0	232903	223674	234845	231504		0	1	1	1	1
1	174888					1	0.750902
2	152487					2	0.654721
5	121131					5	0.520089
10	106798	186707	184307	167756		10	0.458552	0.834728	0.784801	0.724636
30	83224.9	147895	144833	135287		30	0.357336	0.661209	0.616716	0.584385
60	67465.1	129739	128420	123029		60	0.28967	0.580036	0.546828	0.531435
60, -ATP	228889	227280	236164	235393		60, -ATP	0.982762	1.01612	1.00562	1.0168

## Sheet: rep2
	DL680 fluorescence signal of unmodified Ubc6						Fraction of unmodified Ubc6
time (min)	+Doa10	-Doa10	Fusion inhibited	Docked		time (min)	+Doa10	-Doa10	Fusion inhibited	Docked
0	215870	215123	216659	218553		0	1	1	1	1
1	166638					1	0.771936
2	146418					2	0.678266
5	116939					5	0.541709
10	99294.1	172557	172165	154711		10	0.459971	0.802131	0.794636	0.707889
30	80841.5	138120	134485	125001		30	0.374491	0.64205	0.620724	0.571946
60	69221.1	113765	112935	112271		60	0.320661	0.528837	0.521259	0.513701
60, -ATP	210983			220277		60, -ATP	0.977359			1.00789

## Sheet: rep3
	DL680 fluorescence signal of unmodified Ubc6						Fraction of unmodified Ubc6
time (min)	+Doa10	-Doa10	Fusion inhibited	Docked		time (min)	+Doa10	-Doa10	Fusion inhibited	Docked
0	213147	214033	204779	209224		0	1	1	1	1
1	178647					1	0.838142
2	160377					2	0.752425
5	140057					5	0.657094
10	124387	167956	167863	154867		10	0.583575	0.784719	0.819726	0.740195
30	96380.7	136230	129877	122200		30	0.45218	0.636491	0.634229	0.584062
60	78163.5	113192	107753	108146		60	0.366713	0.52885	0.526192	0.516889
60, -ATP	216350	199115	197007	200854		60, -ATP	1.01503	0.9303	0.962046	0.959993

## Sheet: Statistics
	Fraction of unmodified Ubc6
time (min)	+Doa10		-Doa10		Fusion inhibited		Docked
	mean	sd	mean	sd	mean	sd	mean	sd
0	1	0	1	0	1	0	1	0
1	0.78699	0.04553	0.80719	0.02539	0.79972	0.01801	0.72424	0.01616
2	0.69514	0.05099	0.64658	0.01297	0.62389	0.00918	0.58013	0.00709
5	0.57296	0.07366	0.54591	0.02956	0.53143	0.01356	0.52068	0.00945
10	0.5007	0.07178
30	0.39467	0.05054
60	0.32568	0.03877
