# Supplementary material for: Doa10 is a membrane protein retrotranslocase in ER-associated protein degradation
Source: eLife. 2020 Jun 26;9:e56945. doi: 10.7554/eLife.56945 (PMC7319771; doi:10.7554/eLife.56945)
Supplement: Figure 3—source data 1. — It also contains the quantification of the immobilization efficiency of Ubc6 (Figure 3—figure supplement 1C) and of Rhodamine-labeled lipids (Figure 3—figure supplement 1D), as well as the quantification of the extraction efficiency of Ubc6 modified with different ubiquitin chain lengths (Figure 3—figure supplement 1G). [file elife-56945-fig3-data1.xlsx]

## Sheet: rep1
		DL680 fluorescence signal									Fraction of extracted Ubc6
		Ubc6 WT				Ub-Ubc6C87A					Ubc6 WT				Ub-Ubc6C87A
		0-5 ub.	> 5 ub.	-Ubc7, 0-5 ub.	-Ubc7, > 5 ub.	1-5 ub.	>5 ub.				0-5 ub.	> 5 ub.	-Ubc7, 0-5 ub.	-Ubc7, > 5 ub.	1-5 ub.	>5 ub.
Input		54080.5	18504	79200	8150	58135.9	42237.3			-	0.0424582	0.135703	0.0537879	0.0721472	0.0201039	0.0863472
Supernatant	-	2296.16	2511.04	4260	588	1168.76	3647.07			Cdc48/UN	0.0671772	0.336084	0.0698232	0.0876074	0.0315655	0.448581
	Cdc48/UN	3632.98	6218.9	5530	714	1835.09	18946.9			Cdc48	0.0418965	0.128076			0.0250474	0.110358
	Cdc48	2265.78	2369.92			1456.15	4661.22			UN	0.0392857	0.10624			0.0220688	0.0672132
	UN	2124.59	1965.87			1282.99	2838.9			Cdc48E588A/UN	0.0476397	0.133745			0.0311982	0.129812
	Cdc48E588A/UN	2576.38	2474.83			1813.74	5482.89

## Sheet: rep2
		DL680 fluorescence signal									Fraction of extracted Ubc6
		Ubc6 WT				Ub-Ubc6C87A					Ubc6 WT				Ub-Ubc6C87A
		0-5 ub.	> 5 ub.	-Ubc7, 0-5 ub.	-Ubc7, > 5 ub.	1-5 ub.	>5 ub.				0-5 ub.	> 5 ub.	-Ubc7, 0-5 ub.	-Ubc7, > 5 ub.	1-5 ub.	>5 ub.
Input		80119.4	11131.1	85500	4480	72100	22300			-	0.0188954	0.115025	0.0360234	0.0933036	0.0190014	0.0878924
Supernatant	-	1513.89	1280.36	3080	418	1370	1960			Cdc48/UN	0.0337279	0.362589	0.0322807	0.110045	0.034258	0.488789
	Cdc48/UN	2702.26	4036	2760	493	2470	10900			Cdc48	0.0220246	0.118077			0.0190014	0.0910314
	Cdc48	1764.6	1314.32			1370	2030			UN	0.0173526	0.0762406			0.0151179	0.0524664
	UN	1390.28	848.639			1090	1170			Cdc48E588A/UN	0.0197444	0.105859			0.0190014	0.0865471
	Cdc48E588A/UN	1581.91	1178.33			1370	1930

## Sheet: rep3
		DL680 fluorescence signal									Fraction of extracted Ubc6
		Ubc6 WT				Ub-Ubc6C87A					Ubc6 WT				Ub-Ubc6C87A
		0-5 ub.	> 5 ub.	-Ubc7, 0-5 ub.	-Ubc7, > 5 ub.	1-5 ub.	>5 ub.				0-5 ub.	> 5 ub.	-Ubc7, 0-5 ub.	-Ubc7, > 5 ub.	1-5 ub.	>5 ub.
Input		51051.2	13148.1	63300	3620	36800	21000			-	0.0342403	0.200967	0.0556082	0.106906	0.0156522	0.12
Supernatant	-	1748.01	2642.34	3520	387	576	2520			Cdc48/UN	0.0617433	0.641093	0.0507109	0.138398	0.036413	0.614286
	Cdc48/UN	3152.06	8429.15	3210	501	1340	12900			Cdc48	0.0342312	0.213646			0.0221739	0.151429
	Cdc48	1747.54	2809.04			816	3180			UN	0.02713	0.133756			0.0194022	0.0895238
	UN	1385.02	1758.64			714	1880			Cdc48E588A/UN	0.0321807	0.165617			0.0163859	0.0947619
	Cdc48E588A/UN	1642.86	2177.56			603	1990

## Sheet: Statistics
	Fraction of extracted Ubc6
	Ubc6 WT								Ub-Ubc6C87A
	0-5 ub.		> 5 ub.		-Ubc7, 0-5 ub.		-Ubc7, > 5 ub.		1-5 ub.		>5 ub.
	mean	sd	mean	sd	mean	sd	mean	sd	mean	sd	mean	sd
-	0.03186	0.01196	0.15057	0.04486	0.04847	0.01082	0.09079	0.01752	0.01825	0.00232	0.09808	0.019
Cdc48/UN	0.05422	0.01795	0.44659	0.16897	0.05094	0.01877	0.11202	0.02545	0.03408	0.00243	0.51722	0.08643
Cdc48	0.03272	0.01002	0.15327	0.05253					0.02207	0.00302	0.11761	0.03084
UN	0.02792	0.01099	0.10541	0.02877					0.01886	0.00351	0.06973	0.01866
Cdc48E588A/UN	0.03319	0.01397	0.13507	0.0299					0.02053	0.00509	0.10371	0.02298

## Sheet: Fig. 3 - Supp 1C
rep1	Ubc6 DL680 fluorescence signal		Fraction of unbound Ubc6
	Input	Unbound
Ubc6 WT, - Ubc7	30300	8090	0.266997
Ubc6 WT, + Ubc7	29700	11400	0.383838
Ub-Ubc6C87A, + Ubc7	32400	9610	0.296605
rep2	Ubc6 DL680 fluorescence signal		Fraction of unbound Ubc6
	Input	Unbound
Ubc6 WT, - Ubc7	13402.1	2042.92	0.152434
Ubc6 WT, + Ubc7	11706.5	3122.88	0.266764
Ub-Ubc6C87A, + Ubc7	13068.8	2883.11	0.220609
rep3	Ubc6 DL680 fluorescence signal		Fraction of unbound Ubc6
	Input	Unbound
Ubc6 WT, - Ubc7	27111.6	6299.26	0.232345
Ubc6 WT, + Ubc7	26239.8	11122.9	0.423895
Ub-Ubc6C87A, + Ubc7	24728.1	9226.31	0.373111
	Fraction of unbound Ubc6
Statistics	mean	sd
Ubc6 WT, - Ubc7	0.21726	0.05875
Ubc6 WT, + Ubc7	0.35817	0.08165
Ub-Ubc6C87A, + Ubc7	0.29678	0.07625

## Sheet: Fig. 3 - Supp 1D
rep1	Rhodamine fluorescence signal					Fraction of unbound lipids
	Ubc6 WT, - Ubc7	Ubc6 WT, + Ubc7	Ub-Ubc6C87A, + Ubc7			Ubc6 WT, - Ubc7	Ubc6 WT, + Ubc7	Ub-Ubc6C87A, + Ubc7
Input	38881	40118	42508
Unbound	1720	2086	2111		Unbound	0.0442375	0.0519966	0.0496612
-	924	992	961		-	0.0237648	0.0247271	0.0226075
Cdc48/UN	999	954	989		Cdc48/UN	0.0256938	0.0237798	0.0232662
Cdc48		913	950		Cdc48		0.0227579	0.0223487
UN		949	949		UN		0.0236552	0.0223252
Cdc48E588A/UN		964	929		Cdc48E588A/UN		0.0240291	0.0218547
rep2	Rhodamine fluorescence signal					Fraction of unbound lipids
	Ubc6 WT, - Ubc7	Ubc6 WT, + Ubc7	Ub-Ubc6C87A, + Ubc7			Ubc6 WT, - Ubc7	Ubc6 WT, + Ubc7	Ub-Ubc6C87A, + Ubc7
Input	47139	45192	47094
Unbound	3917	4140	4161		Unbound	0.0830947	0.0916091	0.0883552
-	3523	3705	3752		-	0.0747364	0.0819835	0.0796704
Cdc48/UN	3420	3470	3423		Cdc48/UN	0.0725514	0.0767835	0.0726844
Cdc48		3381	3383		Cdc48		0.0748141	0.0718351
UN		3461	3464		UN		0.0765844	0.073555
Cdc48E588A/UN		3402	3657		Cdc48E588A/UN		0.0752788	0.0776532
rep3	Rhodamine fluorescence signal					Fraction of unbound lipids
	Ubc6 WT, - Ubc7	Ubc6 WT, + Ubc7	Ub-Ubc6C87A, + Ubc7			Ubc6 WT, - Ubc7	Ubc6 WT, + Ubc7	Ub-Ubc6C87A, + Ubc7
Input	43384	42893	44824
Unbound	2862	4199	5321		Unbound	0.065969	0.0978948	0.118709
-	1439	1693	1454		-	0.0331689	0.0394703	0.032438
Cdc48/UN	1561	1643	1680		Cdc48/UN	0.035981	0.0383046	0.0374799
Cdc48		1568	1552		Cdc48		0.0365561	0.0346243
UN		1633	1569		UN		0.0380715	0.0350036
Cdc48E588A/UN		1553	1541		Cdc48E588A/UN		0.0362064	0.0343789
						Statistics - Fraction of unbound lipids
						Ubc6 WT, - Ubc7		Ubc6 WT, + Ubc7		Ub-Ubc6C87A, + Ubc7
						mean	sd	mean	sd	mean	sd
					Unbound	0.06443	0.01947	0.0805	0.02488	0.08558	0.03461
					-	0.04389	0.02712	0.04873	0.02973	0.04491	0.03051
					Cdc48/UN	0.04474	0.02463	0.04629	0.02739	0.04448	0.02544
					Cdc48			0.04471	0.02697	0.04294	0.02577
					UN			0.0461	0.02736	0.04363	0.02668
					Cdc48E588A/UN			0.04517	0.02678	0.04463	0.02928

## Sheet: Fig. 3 - Supp 1G
	Ub-Ubc6C87A DL680 fluorescence signal
		Supernatant						Fraction released
# ub.	Input	-	Cdc48/UN	Cdc48	UN	Cdc48E588A/UN		# ub.	-	Cdc48/UN	Cdc48	UN	Cdc48E588A/UN
0	48225.9	599.181	875.978	679.676	593.118	691.742		0	0.0124245	0.0181641	0.0140936	0.0122987	0.0143438
1	4622.4	228.391	241.352	215.615	194.192	239.291		1	0.0494095	0.0522136	0.0466457	0.0420111	0.0517678
2	2265.36	133.512	169.323	163.617	152.303	185.844		2	0.0589363	0.0747444	0.0722256	0.0672313	0.0820376
3	1961.36	136.781	216.838	181.905	158.216	182.477		3	0.069738	0.110555	0.0927446	0.0806664	0.093036
4	1943.16	139.41	304.2	179.664	139.598	163.168		4	0.0717442	0.156549	0.0924595	0.0718409	0.0839707
5	2475.5	157.404	434.924	191.217	153.927	195.172		5	0.0635846	0.175691	0.0772438	0.0621801	0.0788411
6	1873.8	164.58	577.408	204.838	163.122	206.443		6	0.0878324	0.308149	0.109317	0.0870545	0.110173
7	1821.68	148.659	616.157	189.195	138.251	213.809		7	0.0816054	0.338236	0.103858	0.075892	0.117369
8	1906.38	185.602	758.792	219.697	149.6	239.137		8	0.0973585	0.398028	0.115243	0.0784732	0.12544
9	1729.96	156.687	844.509	226.693	139.702	249.951		9	0.0905729	0.488167	0.131039	0.0807547	0.144484
