# Supplementary material for: Doa10 is a membrane protein retrotranslocase in ER-associated protein degradation
Source: eLife. 2020 Jun 26;9:e56945. doi: 10.7554/eLife.56945 (PMC7319771; doi:10.7554/eLife.56945)
Supplement: Figure 4—figure supplement 1—source data 1. [file elife-56945-fig4-figsupp1-data1.xlsx]

## Sheet: Fig4 - Supp1E
Normalized A488 fluorescence signal at t=30 min (after anti-A488 antibody addition)						F (– Doa10) - F (+ Doa10) at 30 min
A488 attached to	Ubc6		Ubc6SybTM
	- Doa10	+ Doa10	- Doa10	+ Doa10			Ubc6	Ubc6SybTM
rep1	0.41408	0.08428	0.39972	0.30853		rep1	0.3298	0.09119
rep2	0.39215	0.06469	0.37803	0.26311		rep2	0.32746	0.11492
rep3	0.40452	0.088	0.42153	0.35775		rep3	0.31652	0.06378
						mean	0.32459	0.08997
						standard deviation	0.00709	0.0256
