# Supplementary material for: Doa10 is a membrane protein retrotranslocase in ER-associated protein degradation
Source: eLife. 2020 Jun 26;9:e56945. doi: 10.7554/eLife.56945 (PMC7319771; doi:10.7554/eLife.56945)
Supplement: Figure 4—source data 1. [file elife-56945-fig4-data1.xlsx]

## Sheet: Fig4B
Normalized A488 fluorescence signal at t=30 min (after anti-A488 antibody addition)						F (– Doa10) - F (+ Doa10) at 30 min
	no Doa10	Doa10	Doa10-N	Doa10-C			Doa10	Doa10-N	Doa10-C
rep1	0.39787	0.05021	0.29676	0.09547		rep1	0.34766	0.10111	0.3024
rep2	0.41808	0.05804	0.27742	0.079		rep2	0.36004	0.14066	0.33908
rep3	0.42242	0.125	0.32955	0.14749		rep3	0.29742	0.09287	0.27493
						mean	0.33504	0.11154	0.30547
						standard deviation	0.03316	0.02555	0.03218
