# Supplementary material for: Doa10 is a membrane protein retrotranslocase in ER-associated protein degradation
Source: eLife. 2020 Jun 26;9:e56945. doi: 10.7554/eLife.56945 (PMC7319771; doi:10.7554/eLife.56945)
Supplement: Figure 4—source data 2. [file elife-56945-fig4-data2.xlsx]

## Sheet: rep1
Ubc6DL680 fluorescence signal					Fraction not cleaved by TEV protease
		Ubc6					Ubc6
TEV protease	Time (min)	Doa10-N	Doa10-C		TEV protease	Time (min)	Doa10-N	Doa10-C
-	5	25000	30000
-	60	26200	31800
+	5	19900	19000		+	5	0.796	0.633333
+	10	18800	16400		+	10	0.752	0.546667
+	20	17900	13300		+	20	0.716	0.443333
+	30	16800	11900		+	30	0.672	0.396667
+	60	14500	8420		+	60	0.58	0.280667
+, detergent	60	724	1170		+, detergent	60	0.02896	0.039

## Sheet: rep2
Ubc6DL680 fluorescence signal					Fraction not cleaved by TEV protease
		Ubc6					Ubc6
TEV protease	Time (min)	Doa10-N	Doa10-C		TEV protease	Time (min)	Doa10-N	Doa10-C
-	5	25069	34239.2
-	60	26582.1	35537.3
+	5	20345.8	21778.3		+	5	0.811593	0.636064
+	10	20315.3	18828.3		+	10	0.810376	0.549904
+	20	19424.2	16262.4		+	20	0.77483	0.474965
+	30	18021.2	15019.9		+	30	0.718864	0.438676
+	60	16214.5	11488.9		+	60	0.646795	0.335547
+, detergent	60	1028.15	1354.33		+, detergent	60	0.0410128	0.0395549

## Sheet: rep3
Ubc6DL680 fluorescence signal					Fraction not cleaved by TEV protease
		Ubc6					Ubc6
TEV protease	Time (min)	Doa10-N	Doa10-C		TEV protease	Time (min)	Doa10-N	Doa10-C
-	5	21913.1	36047.6
-	60	26807.7	37183.6
+	5	21853.3	22368.8		+	5	0.997272	0.620535
+	10	21086.6	18864.1		+	10	0.96228	0.523312
+	20	19584.7	15638.6		+	20	0.893743	0.433831
+	30	19307.7	13948.2		+	30	0.8811	0.386938
+	60	17796.7	10832		+	60	0.812147	0.300493
+, detergent	60	969.214	1357.16		+, detergent	60	0.0442298	0.0376493

## Sheet: Statistics
Fraction not cleaved by TEV protease
		Ubc6
TEV protease	Time (min)	Doa10-N		Doa10-C
		mean	sd	mean	sd
+	5	0.86829	0.11197	0.62998	0.00829
+	10	0.84155	0.10855	0.53996	0.01451
+	20	0.79486	0.09055	0.45071	0.02154
+	30	0.75732	0.10973	0.40743	0.0275
+	60	0.67965	0.11951	0.30557	0.02779
