# Supplementary material for: Doa10 is a membrane protein retrotranslocase in ER-associated protein degradation
Source: eLife. 2020 Jun 26;9:e56945. doi: 10.7554/eLife.56945 (PMC7319771; doi:10.7554/eLife.56945)
Supplement: Figure 4—source data 3. [file elife-56945-fig4-data3.xlsx]

## Sheet: Fig4E
Normalized A488 fluorescence signal at t=30 min (after anti-A488 antibody addition)								F (– Doa10) - F (+ Doa10) at 30 min
	Ubc6		Ubc6SybTM		SybUbc6TM
	- Doa10	+ Doa10	- Doa10	+ Doa10	- Doa10	+ Doa10			Ubc6	Ubc6SybTM	SybUbc6TM
rep1	0.47643	0.079	0.47851	0.44693	0.47471	0.09522		rep1	0.39743	0.03158	0.37949
rep2	0.47643	0.081	0.47851	0.4504	0.47471	0.09906		rep2	0.39543	0.02811	0.37565
rep3	0.47643	0.11517	0.47851	0.48417	0.47471	0.17772		rep3	0.36126	-0.00566	0.29699
								mean	0.38471	0.01801	0.35071
								standard deviation	0.02033	0.02057	0.04656
