# Supplementary material for: Doa10 is a membrane protein retrotranslocase in ER-associated protein degradation
Source: eLife. 2020 Jun 26;9:e56945. doi: 10.7554/eLife.56945 (PMC7319771; doi:10.7554/eLife.56945)
Supplement: Figure 5—figure supplement 1—source data 1. [file elife-56945-fig5-figsupp1-data1.xlsx]

## Sheet: rep1
	non-ubiquitinated Ubc6DL680 fluorescence signal								Fraction of unmodified Ubc6
	Fig. 5 - Supp. 1A (Ubiquitination by Doa10 in presence of Ubc7/Cue1)		Fig. 5 - Supp. 1C (Ubiquitination by Doa10 in the absence of Ubc7/Cue1)		Fig. 5 - Supp. 1F (E3-independent autoubiquitination)				Fig. 5 - Supp. 1A (Ubiquitination by Doa10 in presence of Ubc7/Cue1)		Fig. 5 - Supp. 1C (Ubiquitination by Doa10 in the absence of Ubc7/Cue1)		Fig. 5 - Supp. 1F (E3-independent autoubiquitination)
time (min)	Ub-Ubc6C87A	Ub-Ubc6C87A/SybTM	Ubc6	Ubc6SybTM	Ubc6	Ubc6SybTM		time (min)	Ub-Ubc6C87A	Ub-Ubc6C87A/SybTM	Ubc6	Ubc6SybTM	Ubc6	Ubc6SybTM
0	266427	47921.6	218082	63882.3	227205	62263.5		0	1	1	1	1	1	1
1	233004	43367.3	184262	57409.6	214890	60411.6		1	0.874549	0.904963	0.84492	0.898678	0.945797	0.970258
2	210954	40838.5	159972	51766.2	211844	60314.8		2	0.791788	0.852194	0.733538	0.810337	0.93239	0.968703
5	175545	34058.4	139267	43594.8	197363	56769.5		5	0.658885	0.71071	0.638599	0.682424	0.868657	0.911763
10	158603	29538.7	121296	38439	179775	50917.3		10	0.595296	0.616396	0.556192	0.601716	0.791246	0.817771
30	120663	22979.4	91654.2	29230.9	139539	40865.5		30	0.452891	0.479521	0.420273	0.457575	0.614155	0.656332
60	99578.8	20042.5	76703.5	25897.8	117778	35792.3		60	0.373756	0.418235	0.351718	0.405398	0.518375	0.574852
60, - ATP	256112	46982.6	225342	63065.9	212031	60995.3		60, - ATP	0.961284	0.980404	1.03329	0.98722	0.933216	0.979633

## Sheet: rep2
	non-ubiquitinated Ubc6DL680 fluorescence signal								Fraction of unmodified Ubc6
	Fig. 5 - Supp. 1A (Ubiquitination by Doa10 in presence of Ubc7/Cue1)		Fig. 5 - Supp. 1C (Ubiquitination by Doa10 in the absence of Ubc7/Cue1)		Fig. 5 - Supp. 1F (E3-independent autoubiquitination)				Fig. 5 - Supp. 1A (Ubiquitination by Doa10 in presence of Ubc7/Cue1)		Fig. 5 - Supp. 1C (Ubiquitination by Doa10 in the absence of Ubc7/Cue1)		Fig. 5 - Supp. 1F (E3-independent autoubiquitination)
time (min)	Ub-Ubc6C87A	Ub-Ubc6C87A/SybTM	Ubc6	Ubc6SybTM	Ubc6	Ubc6SybTM		time (min)	Ub-Ubc6C87A	Ub-Ubc6C87A/SybTM	Ubc6	Ubc6SybTM	Ubc6	Ubc6SybTM
0	228146	43694.9	214124	56155.3	222156	56710.2		0	1	1	1	1	1	1
1	204199	41861.3	183231	50992.9	223812	55462.3		1	0.895035	0.958037	0.855726	0.908068	1.00745	0.977995
2	193506	39488.3	162023	45905.1	212100	52711.9		2	0.848169	0.903728	0.756678	0.817467	0.954736	0.929496
5	169891	35212.5	145776	38291.6	196094	50117		5	0.74466	0.805873	0.680801	0.681888	0.882687	0.883738
10	146367	32141.4	126883	33179.7	178129	46627.7		10	0.641548	0.735587	0.592568	0.590856	0.801818	0.82221
30	124183	26863.2	93929.3	25972.1	137638	35733.9		30	0.544316	0.614791	0.438668	0.462505	0.619555	0.630115
60	102600	22432.2	79026.2	22436.8	115791	30953.3		60	0.449713	0.513382	0.369068	0.39955	0.521217	0.545816
60, - ATP	233300	42780	220836	56680.1	218346	56503		60, - ATP	1.02259	0.979062	1.03135	1.00934	0.98285	0.996347

## Sheet: rep3
	non-ubiquitinated Ubc6DL680 fluorescence signal								Fraction of unmodified Ubc6
	Fig. 5 - Supp. 1A (Ubiquitination by Doa10 in presence of Ubc7/Cue1)		Fig. 5 - Supp. 1C (Ubiquitination by Doa10 in the absence of Ubc7/Cue1)		Fig. 5 - Supp. 1F (E3-independent autoubiquitination)				Fig. 5 - Supp. 1A (Ubiquitination by Doa10 in presence of Ubc7/Cue1)		Fig. 5 - Supp. 1C (Ubiquitination by Doa10 in the absence of Ubc7/Cue1)		Fig. 5 - Supp. 1F (E3-independent autoubiquitination)
time (min)	Ub-Ubc6C87A	Ub-Ubc6C87A/SybTM	Ubc6	Ubc6SybTM	Ubc6	Ubc6SybTM		time (min)	Ub-Ubc6C87A	Ub-Ubc6C87A/SybTM	Ubc6	Ubc6SybTM	Ubc6	Ubc6SybTM
0	80823.8	22890.9	97246.4	21734.1	102073	23566.8		0	1	1	1	1	1	1
1	65866.5	20975.1	86237.3	19542.8	95507.4	23634.4		1	0.814939	0.916306	0.886792	0.899177	0.935681	1.00287
2	56767.5	16093	69811.6	16299.8	93184.2	22209		2	0.702361	0.703028	0.717884	0.749966	0.912921	0.942386
5	45415.6	15156.6	61108	13418.8	88896.4	21040.3		5	0.561908	0.662124	0.628384	0.61741	0.870913	0.892792
10	38390.5	13329.2	53755.4	11572.5	79768.6	19194.1		10	0.474989	0.582294	0.552776	0.532462	0.781489	0.814453
30	30632.1	10748.8	42003	9824.71	62994	14942.2		30	0.378998	0.469567	0.431924	0.452042	0.617149	0.634036
60	26483.9	9299.96	34843.4	8752.09	52167.2	12093.6		60	0.327674	0.406272	0.3583	0.40269	0.511079	0.513162
60, - ATP	78470.5	22999.3	94298.3	21255.6	90793.8	21790.4		60, - ATP	0.970883	1.00474	0.969684	0.977984	0.889502	0.924623

## Sheet: Statistics
	Fraction of unmodified Ubc6
	Fig. 5 - Supp. 1A (Ubiquitination by Doa10 in presence of Ubc7/Cue1)				Fig. 5 - Supp. 1C (Ubiquitination by Doa10 in the absence of Ubc7/Cue1)				Fig. 5 - Supp. 1F (E3-independent autoubiquitination)
time (min)	Ub-Ubc6C87A		Ub-Ubc6C87A/SybTM		Ubc6		Ubc6SybTM		Ubc6		Ubc6SybTM
	mean	sd	mean	sd	mean	sd	mean	sd	mean	sd	mean	sd
0	1	0	1	0	1	0	1	0	1	0	1	0
1	0.86151	0.04161	0.92644	0.02795	0.86248	0.02174	0.90197	0.00528	0.96298	0.03885	0.98371	0.01704
2	0.78077	0.07353	0.81965	0.10423	0.73603	0.01952	0.79259	0.03709	0.93335	0.02092	0.94686	0.01998
5	0.65515	0.09143	0.72624	0.07312	0.64926	0.02779	0.66057	0.03738	0.87409	0.00753	0.8961	0.0143
10	0.57061	0.08598	0.64476	0.08049	0.56718	0.02205	0.57501	0.03725	0.79152	0.01017	0.81814	0.00389
30	0.45873	0.08281	0.52129	0.08112	0.43029	0.00931	0.45737	0.00523	0.61695	0.00271	0.64016	0.01414
60	0.38371	0.06163	0.44596	0.05869	0.3597	0.00876	0.40255	0.00293	0.51689	0.00523	0.54461	0.03086
