# Supplementary material for: Doa10 is a membrane protein retrotranslocase in ER-associated protein degradation
Source: eLife. 2020 Jun 26;9:e56945. doi: 10.7554/eLife.56945 (PMC7319771; doi:10.7554/eLife.56945)
Supplement: Figure 5—figure supplement 2—source data 1. [file elife-56945-fig5-figsupp2-data1.xlsx]

## Sheet: rep1
	DL680 fluorescence signal of non-modified Ubc6					Fraction of unmodified Ubc6
time (min)	Doa10	Doa10-N	Doa10-N + Doa10-C		time (min)	Doa10	Doa10-N	Doa10-N + Doa10-C
0	225317	221310	214861		0	1	1	1
1	177996	194887	175530		1	0.789979	0.880606	0.816946
2	161838	187900	164066		2	0.718267	0.849033	0.76359
5	140829	166811	139185		5	0.625025	0.753743	0.647793
10	119829	149654	118271		10	0.531825	0.676218	0.550456
30	89761.4	125694	89421.5		30	0.398377	0.567952	0.416183
60	68860.4	111838	71223.1		60	0.305615	0.505343	0.331485
60, -ATP	216814	219218	218226		60, -ATP	0.962262	0.990545	1.01566

## Sheet: rep2
	DL680 fluorescence signal of non-modified Ubc6					Fraction of unmodified Ubc6
time (min)	Doa10	Doa10-N	Doa10-N + Doa10-C		time (min)	Doa10	Doa10-N	Doa10-N + Doa10-C
0	213814	200921	220599		0	1	1	1
1	167660	186419	181099		1	0.784138	0.927823	0.820943
2	153284	176029	168984		2	0.716904	0.876109	0.766023
5	133648	154967	141950		5	0.625069	0.771285	0.643475
10	118995	138654	130219		10	0.556535	0.69009	0.590297
30	92844.3	112140	102511		30	0.434229	0.558127	0.464692
60	75370.6	103813	86244.8		60	0.352506	0.516687	0.390957
60, -ATP	211316	198162	204766		60, -ATP	0.988317	0.986266	0.928228

## Sheet: rep3
	DL680 fluorescence signal of non-modified Ubc6					Fraction of unmodified Ubc6
time (min)	Doa10	Doa10-N	Doa10-N + Doa10-C		time (min)	Doa10	Doa10-N	Doa10-N + Doa10-C
0	96520.7	96320.6	97178.8		0	1	1	1
1	74037.7	86858.2	75257.6		1	0.767066	0.901762	0.774424
2	66592.6	81631.7	71843.9		2	0.68993	0.8475	0.739296
5	58426.7	72790.3	62250.2		5	0.605328	0.755709	0.640574
10	52035	64311.8	56879.1		10	0.539107	0.667685	0.585304
30	40181	52538.9	44225.5		30	0.416294	0.545459	0.455094
60	32666.4	49609	43313.2		60	0.338439	0.51504	0.445707
60, -ATP	93021.8	90294.1	95570.8		60, -ATP	0.963749	0.937433	0.983453

## Sheet: Statistics
	Fraction of unmodified Ubc6
time (min)	Doa10		Doa10-N		Doa10-N + Doa10-C
	mean	sd	mean	sd	mean	sd
0	1	0	1	0	1	0
1	0.78039	0.01191	0.9034	0.02365	0.8041	0.02578
2	0.70837	0.01598	0.85755	0.01609	0.7563	0.01478
5	0.61847	0.01138	0.76025	0.00961	0.64395	0.00363
10	0.54249	0.0127	0.678	0.01131	0.57535	0.02171
30	0.4163	0.01793	0.55718	0.01128	0.44532	0.02569
60	0.33219	0.02406	0.51236	0.00613	0.38938	0.05713
