# Supplementary material for: Doa10 is a membrane protein retrotranslocase in ER-associated protein degradation
Source: eLife. 2020 Jun 26;9:e56945. doi: 10.7554/eLife.56945 (PMC7319771; doi:10.7554/eLife.56945)
Supplement: Figure 5—figure supplement 2—source data 2. [file elife-56945-fig5-figsupp2-data2.xlsx]

## Sheet: rep1
	DL680 fluorescence signal of Ubc6 modified with n ub.						Fraction of Ubc6 modified with n ubiquitins							Ubiquitins transferred normalized to total Ubc6
sample	Doa10						sample	Doa10						sample	Doa10
time (min)	0 ub.	1 ub.	2 ub.	3 ub.	4 ub.		time (min)	0 ub.	1 ub.	2 ub.	3 ub.	4 ub.		time (min)
0	226664	4487.94	1129.26	271.059	193.92		0		0.0198	0.00498211	0.00119587	0.00085554		0	0.036774
1		35337.3	7474.5	2702.84	1176.67		1		0.155902	0.0329762	0.0119245	0.00519125		1	0.278393
2		41871.6	12195.7	4535.67	2634.52		2		0.18473	0.0538055	0.0200106	0.011623		2	0.398865
5		46770.1	18059.3	8570.52	6158.63		5		0.206342	0.0796746	0.0378116	0.0271708		5	0.587809
10		48040.3	21701.4	11907.4	10304.7		10		0.211945	0.0957428	0.0525335	0.0454625		10	0.742881
30		43818.7	25948	18988.8	19690.7		30		0.19332	0.114478	0.083775	0.086872		30	1.02109
60		33222.1	24234.3	22806.4	25752.4		60		0.14657	0.106917	0.100618	0.113615		60	1.11672
	DL680 fluorescence signal of Ubc6 modified with n ub.						Fraction of Ubc6 modified with n ubiquitins							Ubiquitins transferred normalized to total Ubc6
sample	Doa10-N						sample	Doa10-N						sample	Doa10-N
time (min)	0 ub.	1 ub.	2 ub.	3 ub.	4 ub.		time (min)	0 ub.	1 ub.	2 ub.	3 ub.	4 ub.		time (min)
0	227035	3245.22	1481.56	467.02	323.142		0		0.0142939	0.00652568	0.00205704	0.00142331		0	0.0392096
1		16047.1	3127.32	868.485	398.41		1		0.0706809	0.0137746	0.00382533	0.00175484		1	0.116726
2		24782	4764.52	1391.28	613.944		2		0.109155	0.0209858	0.00612806	0.00270418		2	0.180327
5		37262.5	7941.99	3548.2	1348.97		5		0.164127	0.0349813	0.0156284	0.00594169		5	0.304741
10		46117.7	11972.3	6740.37	2799.16		10		0.20313	0.0527331	0.0296886	0.0123292		10	0.446979
30		46692.8	19927.7	16000.4	9660.04		30		0.205664	0.0877738	0.0704753	0.0425487		30	0.762832
60		33666.2	21115.1	20953.2	17038.4		60		0.148286	0.0930037	0.0922903	0.0750473		60	0.911354
	DL680 fluorescence signal of Ubc6 modified with n ub.						Fraction of Ubc6 modified with n ubiquitins							Ubiquitins transferred normalized to total Ubc6
sample	Doa10-N + Doa10-C						sample	Doa10-N + Doa10-C						sample	Doa10-N + Doa10-C
time (min)	0 ub.	1 ub.	2 ub.	3 ub.	4 ub.		time (min)	0 ub.	1 ub.	2 ub.	3 ub.	4 ub.		time (min)
0	222562	3077.4	1360.81	343.701	269.285		0		0.0138272	0.00611432	0.00154429	0.00120993		0	0.0355284
1		32183.4	6068.93	2065.76	1044.26		1		0.144604	0.0272685	0.00928173	0.00469199		1	0.245754
2		43144	11834.9	3758.15	2237.28		2		0.193852	0.0531759	0.0168859	0.0100524		2	0.391071
5		48970.7	18165.4	7755.4	5549.42		5		0.220032	0.0816198	0.034846	0.0249343		5	0.587547
10		50019.7	22687.3	11380.6	9348.29		10		0.224745	0.101937	0.0511344	0.0420031		10	0.750035
30		44117.2	28409.7	17245.1	18589		30		0.198224	0.127649	0.0774847	0.0835228		30	1.02007
60		32829.5	24355.4	22838	27541.6		60		0.147507	0.109432	0.102614	0.123748		60	1.16921

## Sheet: rep2
	DL680 fluorescence signal of Ubc6 modified with n ub.						Fraction of Ubc6 modified with n ubiquitins							Ubiquitins transferred normalized to total Ubc6
sample	Doa10						sample	Doa10						sample	Doa10
time (min)	0 ub.	1 ub.	2 ub.	3 ub.	4 ub.		time (min)	0 ub.	1 ub.	2 ub.	3 ub.	4 ub.		time (min)
0	216933	3880.52	1115.03	330.604	151.449		0		0.0178881	0.00513996	0.001524	0.000698137		0	0.0355326
1		32227.5	7175.2	3160.16	1227.91		1		0.14856	0.0330757	0.0145675	0.00566032		1	0.281055
2		36469.2	9884.9	6008.7	2701.7		2		0.168113	0.0455667	0.0276985	0.0124541		2	0.392158
5		41477.9	14825.5	9590.44	6089.05		5		0.191202	0.0683413	0.0442093	0.0280689		5	0.572788
10		42152.3	16663.5	13167.6	9114.81		10		0.19431	0.0768142	0.0606989	0.0420168		10	0.698103
30		38769.3	20422.5	18859.2	15478.8		30		0.178716	0.0941422	0.0869357	0.0713532		30	0.91322
60		29670.8	20215.3	21506.8	20675		60		0.136774	0.0931871	0.0991405	0.0953061		60	1.00179
	DL680 fluorescence signal of Ubc6 modified with n ub.						Fraction of Ubc6 modified with n ubiquitins							Ubiquitins transferred normalized to total Ubc6
sample	Doa10-N						sample	Doa10-N						sample	Doa10-N
time (min)	0 ub.	1 ub.	2 ub.	3 ub.	4 ub.		time (min)	0 ub.	1 ub.	2 ub.	3 ub.	4 ub.		time (min)
0	210978	2735.7	1301.04	332.152	216.22		0		0.0129667	0.00616671	0.00157435	0.00102485		0	0.0341226
1		14813.2	2817.66	754.12	341.169		1		0.0702119	0.0133552	0.0035744	0.00161708		1	0.114114
2		22682.6	4516.61	1337.83	652.958		2		0.107512	0.021408	0.0063411	0.00309491		2	0.181731
5		35905.3	7443.09	3262.52	1400.73		5		0.170185	0.035279	0.0154638	0.00663922		5	0.313691
10		42974	11210.9	7286.73	2773.82		10		0.203689	0.0531379	0.0345379	0.0131475		10	0.466168
30		40962.7	15954.6	16689.7	8596.06		30		0.194156	0.075622	0.0791063	0.0407439		30	0.745695
60		20480.9	16402.9	21693	15439		60		0.097076	0.0777472	0.102821	0.0731783		60	0.853747
	DL680 fluorescence signal of Ubc6 modified with n ub.						Fraction of Ubc6 modified with n ubiquitins							Ubiquitins transferred normalized to total Ubc6
sample	Doa10-N + Doa10-C						sample	Doa10-N + Doa10-C						sample	Doa10-N + Doa10-C
time (min)	0 ub.	1 ub.	2 ub.	3 ub.	4 ub.		time (min)	0 ub.	1 ub.	2 ub.	3 ub.	4 ub.		time (min)
0	232661	3226.11	1249.85	381.849	273.176		0		0.0138661	0.00537198	0.00164123	0.00117414		0	0.0342303
1		28655.4	5845.82	2248.63	890.596		1		0.123164	0.0251259	0.00966482	0.00382787		1	0.217721
2		36237	9655.73	4714.76	2530.64		2		0.15575	0.0415013	0.0202645	0.010877		2	0.343054
5		41005.3	14524.1	8238.25	6117.21		5		0.176245	0.0624259	0.0354088	0.0262923		5	0.512493
10		42614.6	17944.7	11711.9	8475.07		10		0.183162	0.077128	0.050339	0.0364267		10	0.634141
30		36594.1	20897	18373.7	16355		30		0.157285	0.0898174	0.0789721	0.0702954		30	0.855018
60		27727.2	18699.2	21361	19747.4		60		0.119174	0.080371	0.0918118	0.0848764		60	0.894857

## Sheet: rep3
	DL680 fluorescence signal of Ubc6 modified with n ub.						Fraction of Ubc6 modified with n ubiquitins							Ubiquitins transferred normalized to total Ubc6
sample	Doa10						sample	Doa10						sample	Doa10
time (min)	0 ub.	1 ub.	2 ub.	3 ub.	4 ub.		time (min)	0 ub.	1 ub.	2 ub.	3 ub.	4 ub.		time (min)
0	99246.4	1360.92	510.09	143.759	102.904		0		0.0137126	0.00513963	0.0014485	0.00103685		0	0.0324847
1		16492.9	3906.44	2065.03	810.581		1		0.166181	0.039361	0.0208071	0.00816736		1	0.339994
2		16804.3	4566.33	2836.51	1289.93		2		0.169318	0.04601	0.0285805	0.0129973		2	0.399069
5		17802.5	6626.07	4710.94	2860.44		5		0.179377	0.0667639	0.0474671	0.0288216		5	0.570592
10		18086.7	8109.11	6505.12	4611.31		10		0.182241	0.0817068	0.0655451	0.0464633		10	0.728143
30		15400.8	9198.58	8519.77	7812.04		30		0.155177	0.0926843	0.0858446	0.0787136		30	0.912934
60		12079.1	9155.49	9500.2	9888.71		60		0.121708	0.09225	0.0957233	0.099638		60	0.99193
	DL680 fluorescence signal of Ubc6 modified with n ub.						Fraction of Ubc6 modified with n ubiquitins							Ubiquitins transferred normalized to total Ubc6
sample	Doa10-N						sample	Doa10-N						sample	Doa10-N
time (min)	0 ub.	1 ub.	2 ub.	3 ub.	4 ub.		time (min)	0 ub.	1 ub.	2 ub.	3 ub.	4 ub.		time (min)
0	99899.2	741.013	653.72	183.432	187.462		0		0.00741761	0.00654379	0.00183617	0.00187651		0	0.0335197
1		7908.77	2133.45	650.379	348.154		1		0.0791675	0.021356	0.00651035	0.00348505		1	0.155351
2		9123.37	1887.3	813.204	423.747		2		0.0913257	0.018892	0.00814025	0.00424175		2	0.170497
5		14569.1	3211.41	1590.59	682.607		5		0.145838	0.0321465	0.015922	0.00683296		5	0.285229
10		18269.8	4749.59	3157.14	1152.08		10		0.182882	0.0475438	0.0316033	0.0115324		10	0.41891
30		17729	7562.44	7229.84	3502.11		30		0.177469	0.0757007	0.0723714	0.0350565		30	0.68621
60		12780.7	8331.36	9067.37	5930.52		60		0.127936	0.0833977	0.0907652	0.059365		60	0.804487
	DL680 fluorescence signal of Ubc6 modified with n ub.						Fraction of Ubc6 modified with n ubiquitins							Ubiquitins transferred normalized to total Ubc6
sample	Doa10-N + Doa10-C						sample	Doa10-N + Doa10-C						sample	Doa10-N + Doa10-C
time (min)	0 ub.	1 ub.	2 ub.	3 ub.	4 ub.		time (min)	0 ub.	1 ub.	2 ub.	3 ub.	4 ub.		time (min)
0	101729	1004.2	719.762	188.307	172.32		0		0.00987139	0.00707531	0.00185107	0.00169392		0	0.0363509
1		14648.2	3371.03	1344.45	636.478		1		0.143993	0.0331375	0.013216	0.00625663		1	0.274942
2		16147.7	4320.46	2075.34	1078.17		2		0.158734	0.0424704	0.0204008	0.0105985		2	0.347271
5		17585.8	6711.72	3510.05	2457.76		5		0.172869	0.0659767	0.034504	0.02416		5	0.504975
10		17669.3	8087.94	5489.78	3714.71		10		0.17369	0.079505	0.0539649	0.0365159		10	0.640659
30		14529.8	9244.48	7557.3	6514.31		30		0.142829	0.0908739	0.0742888	0.0640361		30	0.803587
60		12916.9	9723.73	9897.75	9419.56		60		0.126974	0.095585	0.0972956	0.0925949		60	0.980411

## Sheet: Statistics
Ubiquitins transferred normalized to total Ubc6
sample	Doa10		Doa10-N		Doa10-N + Doa10-C
time (min)	mean	sd	mean	sd	mean	sd
0	0.03493	0.00221	0.03562	0.00313	0.03537	0.00107
1	0.29981	0.03482	0.12873	0.02309	0.24614	0.02861
2	0.3967	0.00393	0.17752	0.00612	0.36047	0.02659
5	0.57706	0.00937	0.30122	0.01455	0.535	0.04566
10	0.72304	0.02282	0.44402	0.02377	0.67495	0.06511
30	0.94908	0.06236	0.73158	0.04021	0.89289	0.1131
60	1.03681	0.06937	0.85653	0.05349	1.01482	0.14038
