# Supplementary material for: Doa10 is a membrane protein retrotranslocase in ER-associated protein degradation
Source: eLife. 2020 Jun 26;9:e56945. doi: 10.7554/eLife.56945 (PMC7319771; doi:10.7554/eLife.56945)
Supplement: Figure 5—source data 1. [file elife-56945-fig5-data1.xlsx]

## Sheet: rep1
	DL680 fluorescence signal of Ubc6 modified with n ub.						Fraction of Ubc6 modified with n ubiquitins							Ubiquitins transferred normalized to total Ubc6
sample	Ubc6						sample	Ubc6						sample	Ubc6
time (min)	0 ub.	1 ub.	2 ub.	3 ub.	4 ub.		time (min)	0 ub.	1 ub.	2 ub.	3 ub.	4 ub.		time (min)
0	227595	5079.66	1755.06	432.701	262.422		0		0.0223188	0.00771133	0.00190119	0.00115302		0	0.0480571
1		35623.5	6808.06	2030.33	1132.21		1		0.156521	0.029913	0.00892077	0.00497467		1	0.263008
2		42135.9	11152.1	4389.58	2910.25		2		0.185135	0.0489999	0.0192867	0.012787		2	0.392143
5		47779.1	17306.1	7724.86	6555.28		5		0.20993	0.0760389	0.0339412	0.0288024		5	0.579041
10		49666.3	21659.9	11296.3	10358.7		10		0.218222	0.0951684	0.0496331	0.0455137		10	0.739513
30		44248.1	24426.5	18032.3	19862.6		30		0.194416	0.107324	0.0792297	0.0872713		30	0.995839
60		34133.6	24809.1	20574	27271.1		60		0.149975	0.109005	0.0903973	0.119823		60	1.11847
	DL680 fluorescence signal of Ubc6 modified with n ub.						Fraction of Ubc6 modified with n ubiquitins							Ubiquitins transferred normalized to total Ubc6
sample	Ubc6SybTM						sample	Ubc6SybTM						sample	Ubc6SybTM
time (min)	0 ub.	1 ub.	2 ub.	3 ub.	4 ub.		time (min)	0 ub.	1 ub.	2 ub.	3 ub.	4 ub.		time (min)
0	66476.7	1017.24	366.853	121.588	66.3		0		0.0153023	0.00551852	0.00182902	0.000997342		0	0.0358157
1		5906.65	810.82	275.06	111		1		0.0888529	0.0121971	0.0041377	0.00166976		1	0.132339
2		9886.45	1188.71	202.735	219		2		0.14872	0.0178816	0.00304971	0.00329439		2	0.20681
5		15105	2309.16	302.091	339		5		0.227223	0.0347363	0.00454431	0.00509953		5	0.330726
10		18258.9	3794.84	1805.82	850		10		0.274666	0.0570852	0.0271647	0.0127864		10	0.521476
30		17444.4	6356.6	4046.77	2500		30		0.262414	0.0956215	0.060875	0.0376071		30	0.786711
60		14382	7614.32	5558.82	4330		60		0.216347	0.114541	0.0836205	0.0651356		60	0.956833

## Sheet: rep2
	DL680 fluorescence signal of Ubc6 modified with n ub.						Fraction of Ubc6 modified with n ubiquitins							Ubiquitins transferred normalized to total Ubc6
sample	Ubc6						sample	Ubc6						sample	Ubc6
time (min)	0 ub.	1 ub.	2 ub.	3 ub.	4 ub.		time (min)	0 ub.	1 ub.	2 ub.	3 ub.	4 ub.		time (min)
0	227430	4840.45	1364.31	201.55	11.7319		0		0.0212832	0.00599879	0.000886204	5.15845e-05		0	0.0361457
1		31874.9	6491.09	3111.7	1191.4		1		0.140152	0.028541	0.013682	0.00523852		1	0.259234
2		37177	10489.7	5650.49	3090.04		2		0.163465	0.0461226	0.0248449	0.0135867		2	0.384592
5		42145	14189	10116.4	6491.09		5		0.185309	0.0623882	0.0444814	0.028541		5	0.557694
10		43200.9	17254.5	13346.8	10539.1		10		0.189952	0.0758673	0.0586854	0.0463397		10	0.703102
30		38186.1	19587.1	19307	17359.9		30		0.167902	0.0861234	0.0848918	0.0763306		30	0.900147
60		29280.6	19114.9	22800	23663.2		60		0.128745	0.084047	0.10025	0.104046		60	1.01377
	DL680 fluorescence signal of Ubc6 modified with n ub.						Fraction of Ubc6 modified with n ubiquitins							Ubiquitins transferred normalized to total Ubc6
sample	Ubc6SybTM						sample	Ubc6SybTM						sample	Ubc6SybTM
time (min)	0 ub.	1 ub.	2 ub.	3 ub.	4 ub.		time (min)	0 ub.	1 ub.	2 ub.	3 ub.	4 ub.		time (min)
0	58200	564	225	72.5	34.5		0		0.00969072	0.00386598	0.0012457	0.000592784		0	0.0235309
1		4700	423	168	50		1		0.080756	0.00726804	0.0028866	0.000859107		1	0.107388
2		7870	777	358	89		2		0.135223	0.0133505	0.0061512	0.00152921		2	0.186495
5		12500	1730	1060	334		5		0.214777	0.0297251	0.0182131	0.00573883		5	0.351821
10		14800	2410	2400	685		10		0.254296	0.0414089	0.0412371	0.0117698		10	0.507904
30		14400	4000	4870	2070		30		0.247423	0.0687285	0.083677	0.035567		30	0.778179
60		11300	3980	7050	3990		60		0.194158	0.0683849	0.121134	0.0685567		60	0.968557

## Sheet: rep3
	DL680 fluorescence signal of Ubc6 modified with n ub.						Fraction of Ubc6 modified with n ubiquitins							Ubiquitins transferred normalized to total Ubc6
sample	Ubc6						sample	Ubc6						sample	Ubc6
time (min)	0 ub.	1 ub.	2 ub.	3 ub.	4 ub.		time (min)	0 ub.	1 ub.	2 ub.	3 ub.	4 ub.		time (min)
0	99739.6	1420.04	587.988	237.976	140.821		0		0.0142375	0.00589523	0.00238597	0.00141189		0	0.0388334
1		17675.8	3545.64	1680.06	629.229		1		0.177219	0.035549	0.0168444	0.00630872		1	0.324085
2		19084.8	4952.83	3062.67	1326.15		2		0.191347	0.0496576	0.0307067	0.0132962		2	0.435967
5		19269.1	7118.8	4746.43	3049.14		5		0.193195	0.0713739	0.0475882	0.030571		5	0.600991
10		18606.5	8578.56	5846.2	4447.45		10		0.18655	0.0860096	0.0586147	0.0445906		10	0.712776
30		16585.5	9742.17	8585.39	8093		30		0.166289	0.0976761	0.086078	0.0811414		30	0.94444
60		13253.6	8993.99	10224	10658.1		60		0.132882	0.0901748	0.102507	0.106859		60	1.04819
	DL680 fluorescence signal of Ubc6 modified with n ub.						Fraction of Ubc6 modified with n ubiquitins							Ubiquitins transferred normalized to total Ubc6
sample	Ubc6SybTM						sample	Ubc6SybTM						sample	Ubc6SybTM
time (min)	0 ub.	1 ub.	2 ub.	3 ub.	4 ub.		time (min)	0 ub.	1 ub.	2 ub.	3 ub.	4 ub.		time (min)
0	22515.4	572.316	155.46	52.8372	28.8533		0		0.0254189	0.00690459	0.00234671	0.00128149		0	0.0513942
1		3168.22	414.965	162.018	57.117		1		0.140713	0.0184302	0.00719588	0.0025368		1	0.209309
2		4384.57	394.884	299.966	81.35		2		0.194736	0.0175384	0.0133227	0.00361308		2	0.284234
5		6008.29	739.862	604.43	185.346		5		0.266852	0.0328602	0.0268452	0.00823196		5	0.446036
10		6267.55	1190.65	902.535	361.258		10		0.278367	0.0528815	0.0400852	0.0160449		10	0.568566
30		5390.69	1762.04	1724.75	955.444		30		0.239422	0.0782593	0.0766029	0.0424351		30	0.79549
60		4156.77	1759.22	2237.93	1573.6		60		0.184619	0.078134	0.0993955	0.0698898		60	0.918633

## Sheet: Statistics
Fraction of Ubc6 modified with n ubiquitins										Ubiquitins transferred normalized to total Ubc6
sample	Ubc6									sample	Ubc6
time (min)	1 ub.		2 ub.		3 ub.		4 ub.
	mean	sd	mean	sd	mean	sd	mean	sd		time (min)	mean	sd
0	0.01928	0.0044	0.00654	0.00102	0.00172	0.000765344	0.000872164	0.000722333		0	0.04101	0.00625
1	0.15796	0.01858	0.03133	0.00371	0.01315	0.00399	0.00551	0.000706476		1	0.28211	0.0364
2	0.17998	0.01464	0.04826	0.00188	0.02207	0.00393	0.01322	0.000404844		2	0.40423	0.02774
5	0.19614	0.01257	0.06993	0.00694	0.042	0.00715	0.0293	0.0011		5	0.57924	0.02165
10	0.19824	0.01739	0.08568	0.00965	0.05564	0.00521	0.04548	0.000874993		10	0.71846	0.01886
30	0.1762	0.01579	0.09704	0.01061	0.0834	0.00366	0.08158	0.00548		30	0.94681	0.04789
60	0.1372	0.01125	0.09441	0.01301	0.09772	0.00644	0.11024	0.00842		60	1.06014	0.05336
Fraction of Ubc6 modified with n ubiquitins										Ubiquitins transferred normalized to total Ubc6
sample	Ubc6SybTM									sample	Ubc6SybTM
time (min)	1 ub.		2 ub.		3 ub.		4 ub.
	mean	sd	mean	sd	mean	sd	mean	sd		time (min)	mean	sd
0	0.0168	0.00797	0.00543	0.00152	0.00181	0.000550831	0.000957205	0.000346103		0	0.03691	0.01396
1	0.10344	0.03253	0.01263	0.00559	0.00474	0.00222	0.00169	0.000839003		1	0.14968	0.05313
2	0.15956	0.0312	0.01626	0.00252	0.00751	0.00527	0.00281	0.00112		2	0.22585	0.05158
5	0.23628	0.02719	0.03244	0.00253	0.01653	0.01124	0.00636	0.00166		5	0.37619	0.0614
10	0.26911	0.01296	0.05046	0.00811	0.03616	0.00781	0.01353	0.00223		10	0.53265	0.03184
30	0.24975	0.01167	0.08087	0.01364	0.07372	0.01167	0.03854	0.00353		30	0.78679	0.00866
60	0.19837	0.01628	0.08702	0.02433	0.10138	0.01884	0.06786	0.00245		60	0.94801	0.02611
