# Supplementary material for: Doa10 is a membrane protein retrotranslocase in ER-associated protein degradation
Source: eLife. 2020 Jun 26;9:e56945. doi: 10.7554/eLife.56945 (PMC7319771; doi:10.7554/eLife.56945)
Supplement: Figure 5—source data 2. [file elife-56945-fig5-data2.xlsx]

## Sheet: rep1
	DL680 fluorescence signal of non-modified Ubc6					Fraction of unmodified Ubc6
time (min)	Doa10	Doa10-N	Doa10-N + Doa10-C		time (min)	Doa10	Doa10-N	Doa10-N + Doa10-C
0	261705	260284	252913		0	1	1	1
1	223555	243737	226992		1	0.854225	0.936426	0.897509
2	199463	237771	203826		2	0.762165	0.913507	0.805913
5	165498	215856	164507		5	0.632384	0.829308	0.650448
10	147511	199359	142172		10	0.563653	0.765928	0.562136
30	116004	175162	110648		30	0.443261	0.672967	0.437494
60	91866.4	159197	88177.1		60	0.35103	0.611626	0.348646
60, -ATP	246777	246750	249791		60, -ATP	0.94296	0.948002	0.987657

## Sheet: rep2
	DL680 fluorescence signal of non-modified Ubc6					Fraction of unmodified Ubc6
time (min)	Doa10	Doa10-N	Doa10-N + Doa10-C		time (min)	Doa10	Doa10-N	Doa10-N + Doa10-C
0	235217	227588	221529		0	1	1	1
1	200923	215892	200978		1	0.8542	0.948607	0.907229
2	175991	213436	186939		2	0.748204	0.937816	0.843856
5	158898	201052	166617		5	0.675538	0.883401	0.752121
10	140142	195345	149523		10	0.595797	0.858329	0.67496
30	114510	167862	126039		30	0.486829	0.737571	0.568951
60	96567.2	149888	111985		60	0.410545	0.658594	0.505511
60, -ATP	219835	218732	226185		60, -ATP	0.934605	0.961086	1.02102

## Sheet: rep3
	DL680 fluorescence signal of non-modified Ubc6					Fraction of unmodified Ubc6
time (min)	Doa10	Doa10-N	Doa10-N + Doa10-C		time (min)	Doa10	Doa10-N	Doa10-N + Doa10-C
0	82846.4	83634.2	84692.2		0	1	1	1
1	64201.2	79679.9	64717.2		1	0.774943	0.952718	0.764146
2	57832.9	75543.7	59185.3		2	0.698074	0.903263	0.698829
5	46165.4	69767.2	51900.9		5	0.557241	0.834194	0.612819
10	40516.6	64477.4	43636.6		10	0.489057	0.770945	0.515238
30	32189.8	52202.8	34233.3		30	0.388548	0.62418	0.404209
60	28261.8	48776.7	31205.8		60	0.341135	0.583215	0.368462
60, -ATP	78822.4	81691	78072.5		60, -ATP	0.951428	0.976765	0.921839

## Sheet: Statistics
	Fraction of unmodified Ubc6
time (min)	Doa10		Doa10-N		Doa10-N + Doa10-C
	mean	sd	mean	sd	mean	sd
0	1	0	1	0	1	0
1	0.82779	0.04577	0.94592	0.00847	0.85629	0.07995
2	0.73615	0.0337	0.9182	0.01775	0.78287	0.07521
5	0.62172	0.05986	0.84897	0.02992	0.6718	0.07206
10	0.5495	0.05476	0.7984	0.05196	0.58411	0.0821
30	0.43955	0.04925	0.67824	0.05688	0.47022	0.08711
60	0.36757	0.03754	0.61781	0.03807	0.40754	0.08542
