# Supplementary material for: Doa10 is a membrane protein retrotranslocase in ER-associated protein degradation
Source: eLife. 2020 Jun 26;9:e56945. doi: 10.7554/eLife.56945 (PMC7319771; doi:10.7554/eLife.56945)
Supplement: Figure 6—source data 1. [file elife-56945-fig6-data1.xlsx]

## Sheet: Fig6B
Normalized A488 fluorescence signal at t=30 min (after anti-A488 antibody addition)								F (– Doa10) - F (+ Doa10) at 30 min
	Buffer		Biotin		Biot. Protein
	- Doa10	+ Doa10	- Doa10	+ Doa10	- Doa10	+ Doa10			Buffer	Biotin	Biot. Protein
rep1	0.48056	0.4599	0.49611	0.09806	0.46433	0.3417		rep1	0.02066	0.39805	0.12263
rep2	0.4794	0.43388	0.47275	0.05868	0.49104	0.2831		rep2	0.04552	0.41407	0.20794
rep3	0.49645	0.46642	0.50034	0.10542	0.5086	0.34695		rep3	0.03003	0.39492	0.16165
								mean	0.03207	0.40235	0.16408
								standard deviation	0.01256	0.01027	0.04271
			s
