# Supplementary material for: Doa10 is a membrane protein retrotranslocase in ER-associated protein degradation
Source: eLife. 2020 Jun 26;9:e56945. doi: 10.7554/eLife.56945 (PMC7319771; doi:10.7554/eLife.56945)
Supplement: Figure 6—source data 2. [file elife-56945-fig6-data2.xlsx]

## Sheet: Fig6D
Normalized A488 fluorescence signal at t=30 min (after anti-A488 antibody addition)									F (– Cdc48/UN) - F (+ Cdc48/UN) at 30 min
	-Ubiquitin		-Ubc7		+Ubc7
	- Cdc48/UN	+ Cdc48/UN	- Cdc48/UN	+ Cdc48/UN	- Cdc48/UN	+ Cdc48/UN	+ Cdc48E588A/UN			- Ubiquitin	- Ubc7	+ Ubc7	+ Ubc7, Cdc48E588A
rep1	0.44997	0.45459	0.45303	0.41223	0.45352	0.08102	0.45178		rep1	-0.00462	0.0408	0.3725	0.00174
rep2	0.48822	0.48204	0.4779	0.45223	0.47732	0.20158	0.48101		rep2	0.00618	0.02567	0.27574	-0.00369
rep3	0.46475	0.4693	0.44741	0.43715	0.44007	0.15532	0.43583		rep3	-0.00455	0.01026	0.28475	0.00424
									mean	-0.00099445	0.02557	0.311	0.000766048
									standard deviation	0.00622	0.01527	0.05345	0.00405
			s
