# Supplementary material for: Doa10 is a membrane protein retrotranslocase in ER-associated protein degradation
Source: eLife. 2020 Jun 26;9:e56945. doi: 10.7554/eLife.56945 (PMC7319771; doi:10.7554/eLife.56945)
Supplement: Figure 6—source data 3. [file elife-56945-fig6-data3.xlsx]

## Sheet: Sheet1
Streptavidin signal in top fraction						Fraction of Streptavidin in top fraction after extraction
	- Cdc48/UN		+Cdc48/UN
rep1	17553.2	16083	15321	15069.6		rep1	0.903509
rep2	15023.1	18179.8	14609.2	16528.2		rep2	0.937793
rep3	19540.1	19373.7	16044.7	17099		rep3	0.851721
	*		*			mean	0.89767
						sd	0.04333
* reactions were performed in duplicates
